# Supplementary material for: Differential Role of Anti-Viral Sensing Pathway for the Production of Type I Interferon β in Dendritic Cells and Macrophages Against Respiratory Syncytial Virus A2 Strain Infection
Source: MDPI journal article supplement (doi:10.3390/v11010062), 2019-01-15
Supplement: s1 [file s1]

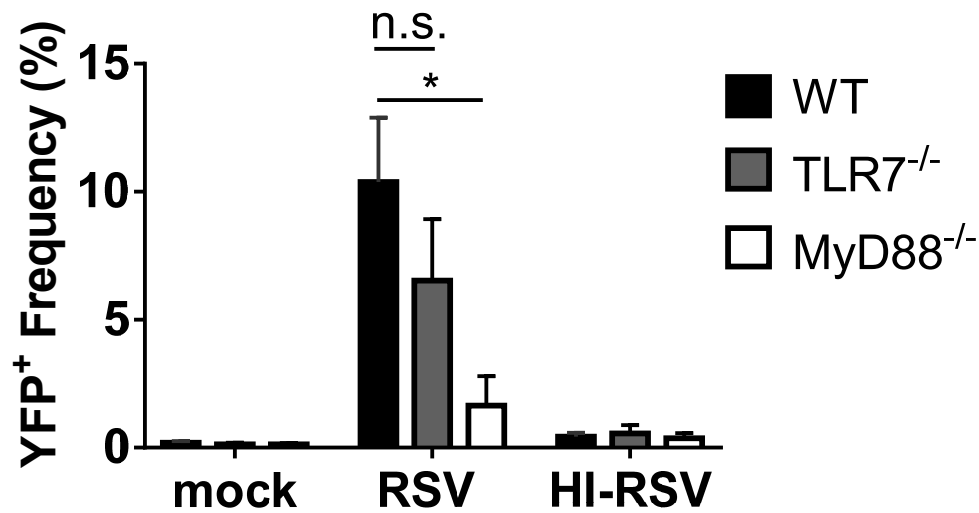

**Figure S1.** The MyD88-dependent pathways, but not TLR7-dependent pathway, are essential for the production of IFN- $\beta$  in BM-DCs. (A) BM cells from IFN- $\beta$ /YFP reporter (WT) mice, MyD88-deficient IFN- $\beta$ /YFP reporter (MyD88<sup>-/-</sup>) mice or TLR7-deficient IFN- $\beta$ /YFP reporter (TLR7<sup>-/-</sup>) mice were differentiated to BM-DCs. BM-DCs were infected with RSV and heat-inactivated RSV (HI-RSV) at an MOI. These cells were harvested at 18 h after stimulation and analyzed for the expression of IFN- $\beta$  by flow cytometry. Frequency of YFP<sup>+</sup> cells shown as bar graph. Data were combined from three biological experiments and data are represented as mean  $\pm$  SEM.
